# Supplementary material
Source: PubMed Central journal article supplement (PMC3877789)
Supplement: supp_tpc.113.117390_tpc117390_SupplementalData.pdf [file supp_tpc.113.117390_tpc117390_SupplementalData.pdf]

## SUPPLEMENTAL DATA

### A

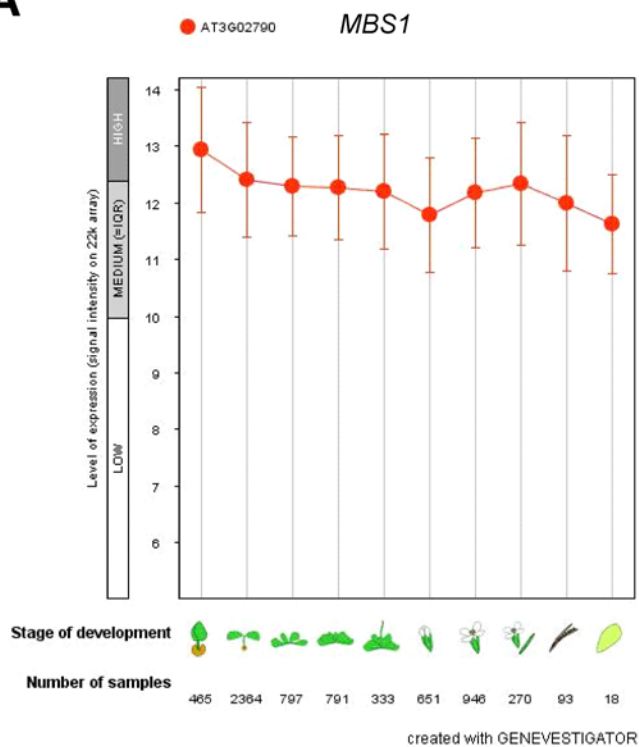

### B

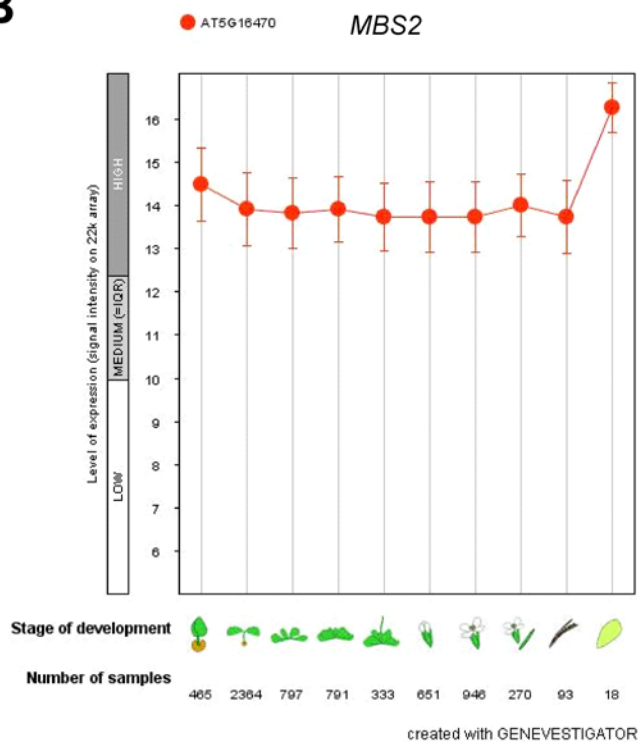

**Supplemental Figure 1.** Expression patterns of (A) *MBS1* and (B) *MBS2* in different tissues and developmental stages of *Arabidopsis thaliana*. The data are based on Affymetrix GeneChip data and were extracted from the Genevestigator database (<https://www.genevestigator.com>). The symbols representing the different tissues and developmental stages stand for (from left to right): germinated seeds, seedling, young rosette, developed rosette, bolting rosette, young flower, developed flower, flowers and siliques, mature siliques and senescent leaves.

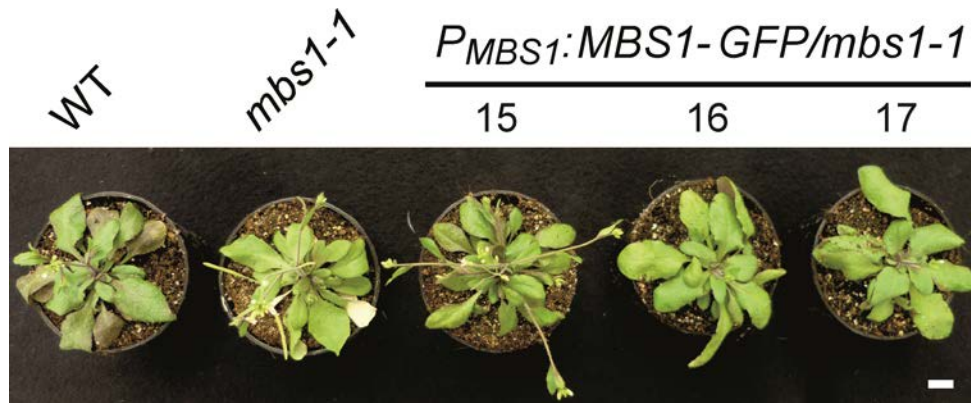

**Supplemental Figure 2.** Phenotypic analysis of three additional complemented lines of the *Arabidopsis mbs1-1* mutant under high light stress (cf. Figure 2C).

A wild-type plant (WT), the *mbs1-1* mutant and three independently generated complemented lines ( $P_{MBS1}:MBS1-GFP/mbs1-1$  lines 15, 16 and 17) are compared. Scale bar: 1 cm.

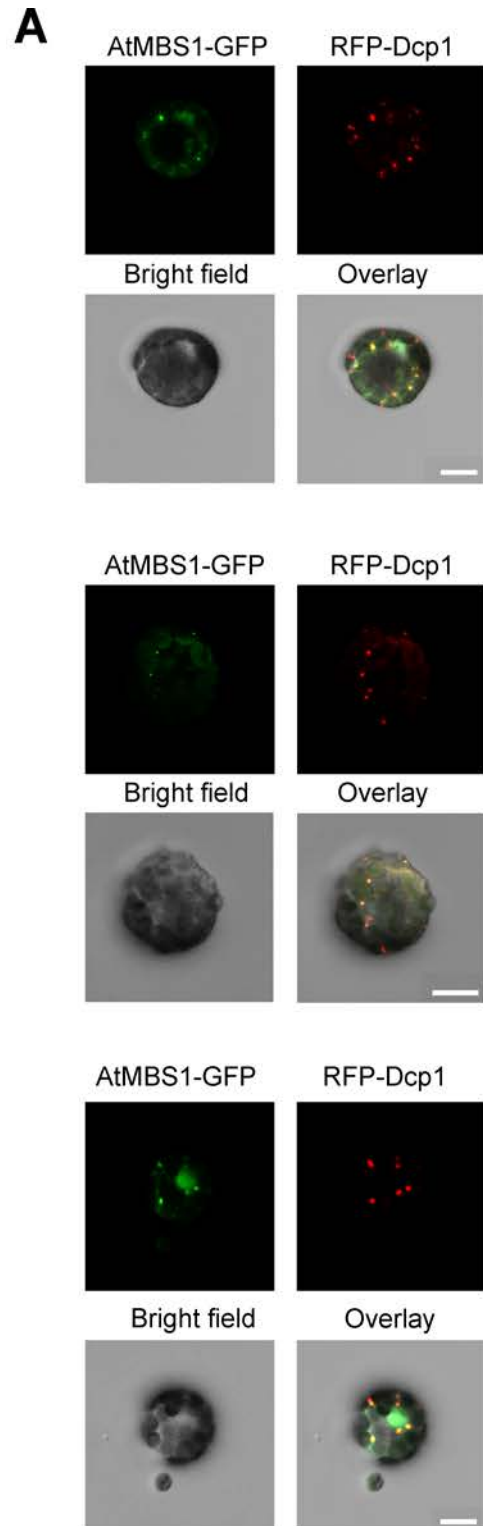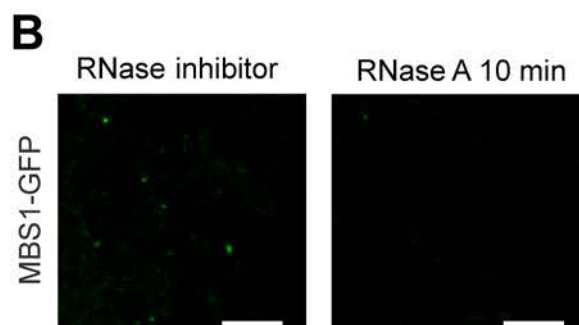

**Supplemental Figure 3.** AtMBS1 localization to P-bodies (PBs) under  $^1\text{O}_2$  stress and RNase sensitivity of MBS-containing cytosolic granules. **(A)** Localization to PBs. The AtMBS1-GFP fusion protein was transiently co-expressed in tobacco protoplasts with the RFP-labeled PB marker Dcp1 (Weber et al., 2008). Co-localization was observed 30 min after induction of  $^1\text{O}_2$  stress by exposure to high light ( $500 \mu\text{E m}^{-2} \text{s}^{-1}$ ) in the presence of  $0.5 \mu\text{M}$  MB (upper set of images),  $1 \mu\text{M}$  MB (middle set) or under heat stress at  $39^\circ\text{C}$  (lower set). Three sets of images are shown. Scale bars:  $10 \mu\text{m}$ . **(B)** Microscopic analysis of cytosolic granules prepared according to a protocol for P-body enrichment (Teixeira et al., 2005) from *P<sub>MBS1</sub>:MBS1-GFP/mb1-1* plants after high-light stress. The preparations of enriched granules were incubated in the presence of RNase inhibitor or RNase A for 10 min at room temperature and then examined for GFP fluorescence in the confocal microscope. Scale bar:  $10 \mu\text{m}$ .

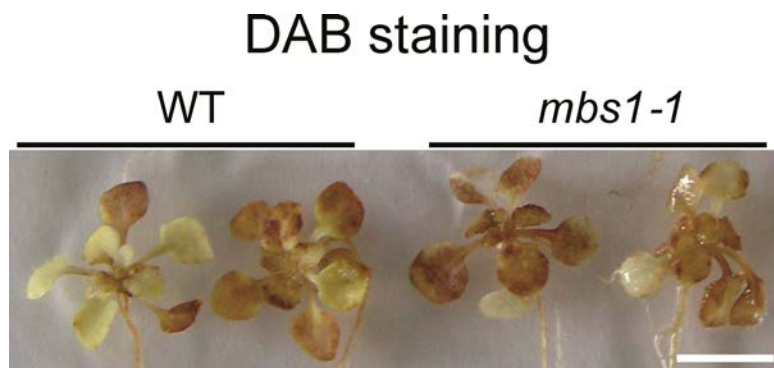

**Supplemental Figure 4.** Production of hydrogen peroxide ( $H_2O_2$ ) in response to high-light stress in *Arabidopsis* wild type (WT) seedlings and the *mbs1-1* mutant.

20 day-old seedlings pretreated in high light (HL,  $900 \mu E m^{-2} s^{-1}$ ) for 2 days were stained with DAB for 3 h in the dark and then exposed to HL for 1 h. To visualize the staining, the leaf pigments were extracted with ethanol. Scale bar: 0.5 cm.

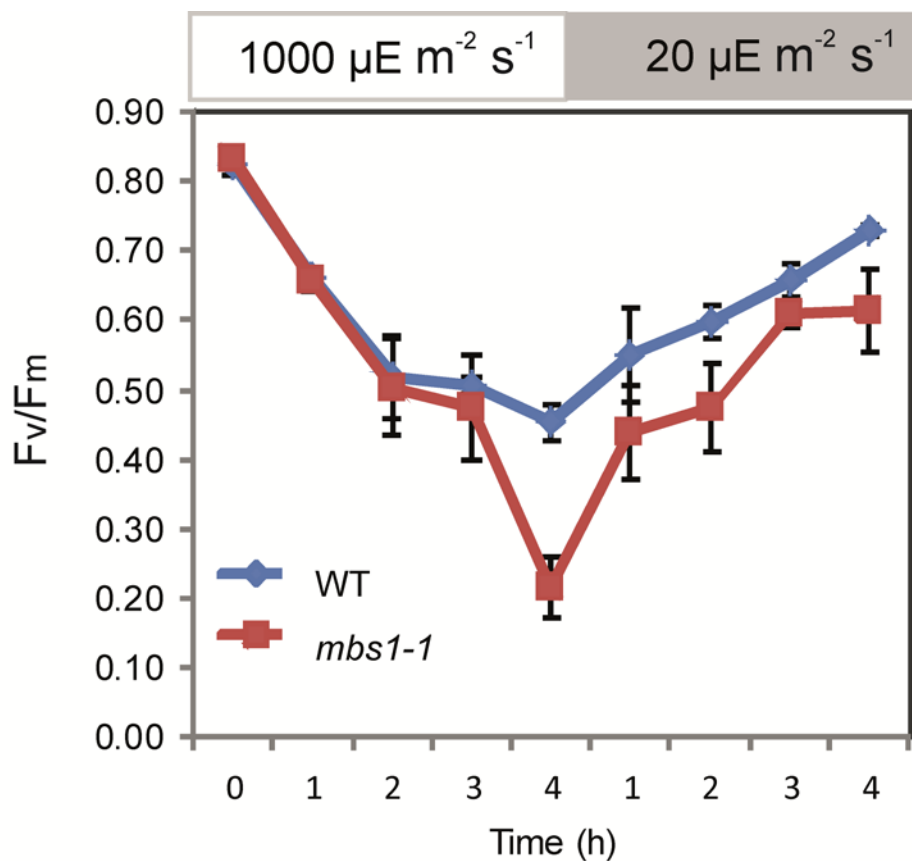

**Supplemental Figure 5.** Photosystem II (PSII) photoinhibition in leaves of *Arabidopsis* wild-type plants (WT) and *mbs1-1* mutant plants exposed to high-light stress.

PSII photoinhibition was measured as the decrease in the chlorophyll fluorescence ratio  $F_v/F_m$ . Leaves were exposed to  $1000 \mu\text{E m}^{-2} \text{s}^{-1}$  for 4 h, and then allowed to recover at low light intensity ( $20 \mu\text{E m}^{-2} \text{s}^{-1}$ ) for 4 h. The values represent the means of three biological replicates, error bars indicate the standard deviation.

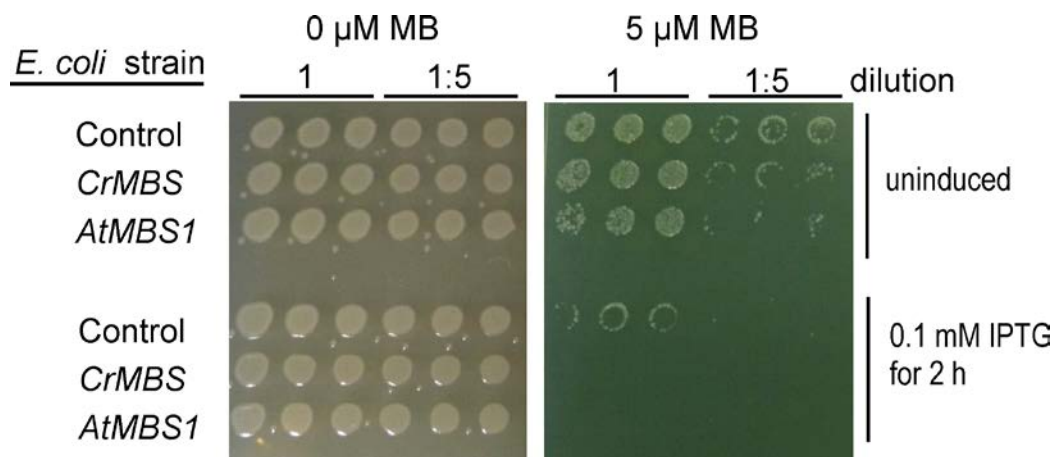

**Supplemental Figure 6.** Test for a possible  $^1\text{O}_2$ -scavenging function of MBS proteins in *E. coli*. The *CrMBS* and *AtMBS1* genes were overexpressed from pET vectors and compared to a control strain overexpressing an ovalbumin protein fragment. Protein expression was induced by addition of IPTG. Spot tests of two different concentrations of bacterial cells are shown.  $^1\text{O}_2$  stress was applied by growth on LB medium containing 5 μM MB in the light. Each sample was analyzed in triplicate. Note that tolerance to  $^1\text{O}_2$  stress in the MBS-expressing strains is not elevated compared to the control strain. It may even be slightly lower (as evidenced by some growth of the undiluted control strain in the presence of MB), presumably due to the metabolic burden imposed by massive overexpression of the MBS proteins.



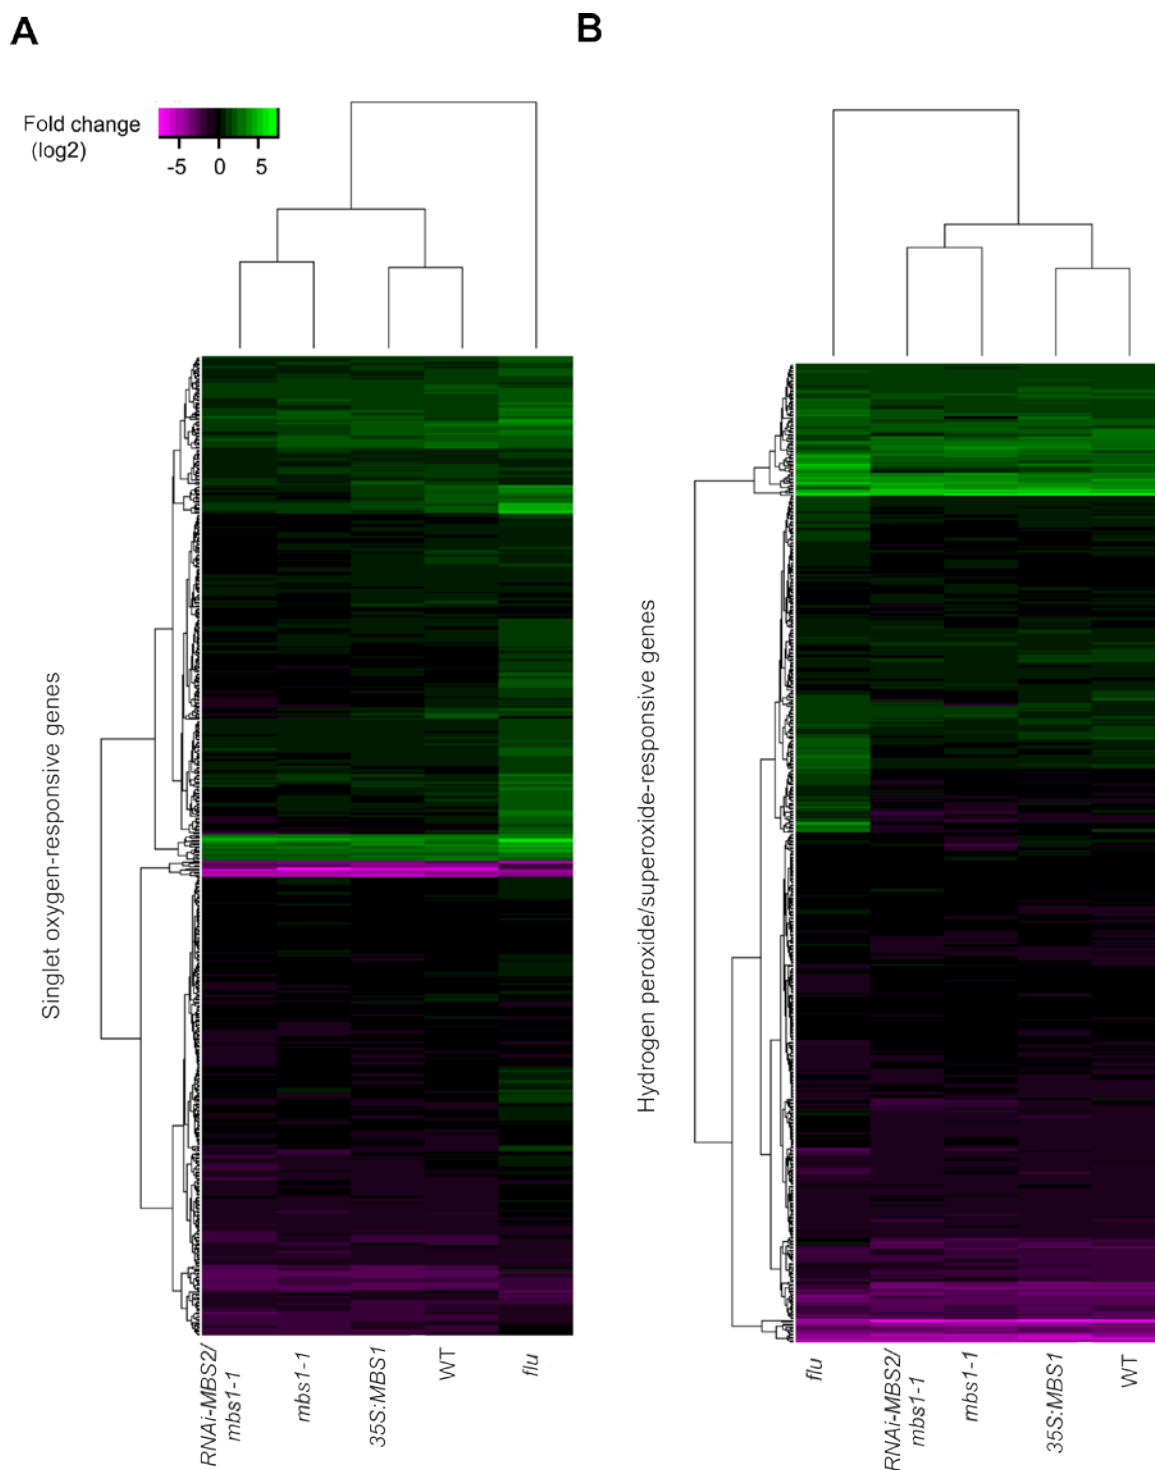

**Supplemental Figure 7.** Light stress response of genes previously reported as responsive to reactive oxygen species. Heat maps of microarray data are shown for the wild type (WT), the

*mbs1-1* mutant, the *RNAi-MBS2/mbs1-1* double mutant, the *35S:MBS1* overexpression line and the *flu* mutant.

(A) Heat map of  $^1\text{O}_2$ -responsive genes (op den Camp et al., 2003; Gadjev et al., 2006).

(B) Heat map of  $\text{H}_2\text{O}_2/\text{O}_2^-$ -responsive genes (Gadjev et al., 2006; Supplemental Dataset 1 online). For each gene and plant line, the ratio of the expression value prior to the high-light stress to the expression value 3 h after the onset of the high-light stress was calculated. Red indicates up-regulation and green indicates down-regulation (cf. Figure 7).

**A**

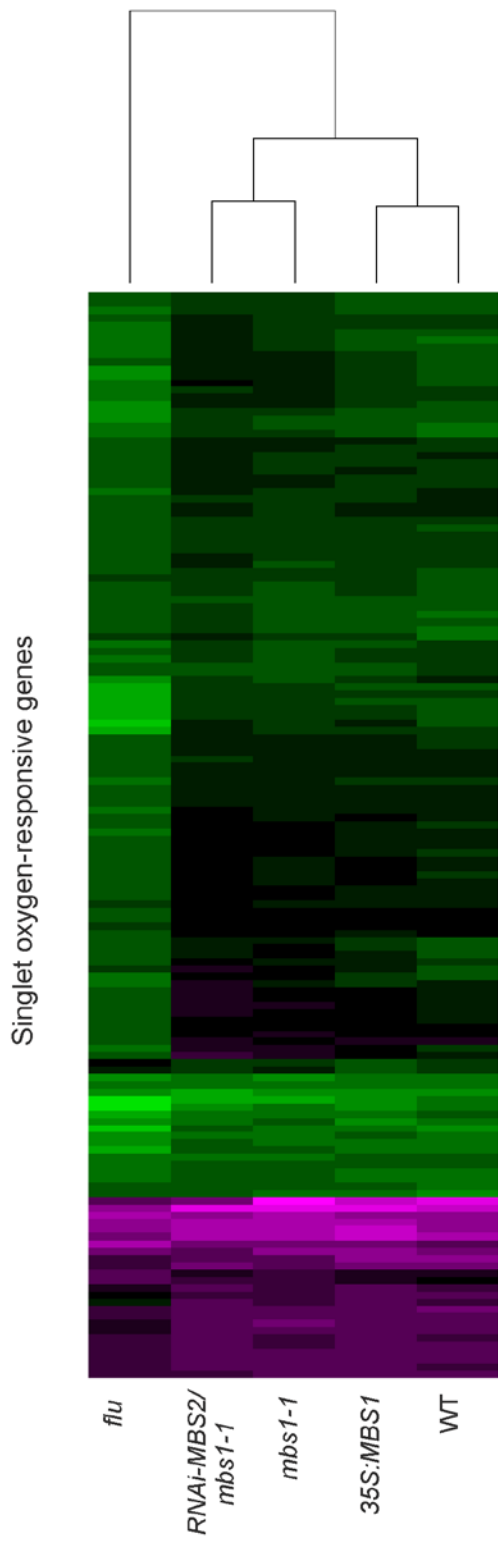

**B**

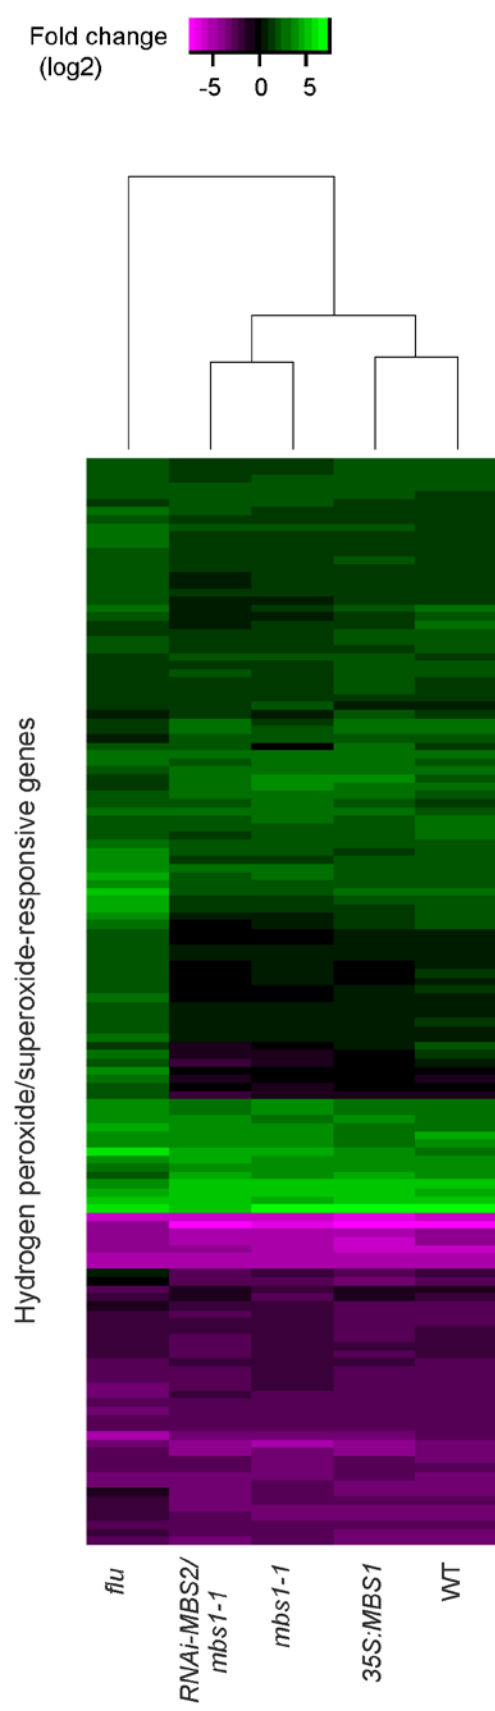

**Supplemental Figure 8.** ROS-responsive genes that are significantly changed in their expression under light stress ( $p$ -value threshold: 0.05, Student's  $t$ -test with FDR correction and  $|\log_2\text{-fold change}|\geq 2$ ) in at least one of the plant lines analyzed (WT = wild type, *mbs1-1*, *RNAi-MBS2/mbs1-1*, *35S:MBS1* and *flu*).

(A) Heat map of  $^1\text{O}_2$ -responsive genes.

(B) Heat map of  $\text{H}_2\text{O}_2/\text{O}_2^-$ -responsive genes (Gadjev et al., 2006; Supplemental Dataset 1 online). For each gene and plant line, the ratio of the expression value prior to the high-light stress to the expression value 3 h after the onset of the high-light stress was calculated. Red indicates up-regulation and green indicates down-regulation (cf. Supplemental Dataset 2 online; Figure 7).

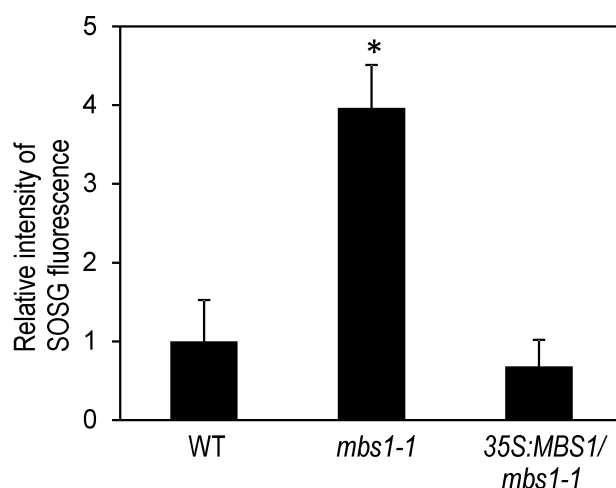

**Supplemental Figure 9.** Quantitation of  $^1\text{O}_2$  accumulation in leaves of the *Arabidopsis* wild type (WT), the *mbs1-1* mutant and the *35S:MBS1/mbs1-1* transgenic line under light stress.

Seedlings were stained with singlet oxygen sensor green (SOSG) and the fluorescence intensities were quantified using the software Image J. Fluorescence intensities are displayed as relative values to the WT after the HL treatment, to which a value of 1 was assigned. Data represent mean values of ten biological replicates. The standard deviation is indicated by error bars. Significant differences are indicated by asterisks ( $p < 0.01$ ).

**Supplemental Table 1.** Oligonucleotides used for *Chlamydomonas*. Restriction sites are underlined, lowercase letters indicate extra nucleotides introduced at the 5' end.

| Primer        | Sequence 5'→3'                             | Gene          |
|---------------|--------------------------------------------|---------------|
| LMS-Hyg-f     | CTGCACGACTTCGAGGTGTT                       | <i>aph7''</i> |
| LMS-Hyg-r     | TCCGAATCAATACGGTCGAG                       |               |
| Inv-Hyg-f     | GAACTGCTCGCCTTCACCTTC                      | <i>aph7''</i> |
| Inv-Hyg-r     | CTCCCAGAATTCCTGGTCG                        |               |
| NdeI-ZF       | ggaattc <u>CATATGGGAAAGGCTAAGCCC</u>       | Cr-MBS        |
| ZF-EcoRI      | g <u>GAATTCTCACTTCTTGGTAGATCCGC</u>        |               |
| NdeHpa-ZF     | ggaattc <u>CATATGGTTAACGGAAAGGCTAAGCCC</u> | Cr-MBS        |
| ZF-SnaBEcoRI  | g <u>GAATTCTCATACGTA</u> CTTCTTGGTAGATCCGC |               |
| HpaI-YFP      | <u>GTTAAC</u> GTGAGCAAGGGCGAGG             | YFP           |
| YFP-SnaB      | <u>TACGTA</u> CTTGATCAGCTCGTCCATGC         |               |
| YFP-TGA-EcoRI | g <u>GAATTCTCACTT</u> GATCAGCTCGTCCATGC    | YFP           |
| SnaB-YFP      | <u>TACGTA</u> GTGAGCAAGGGCGAGG             |               |

**Supplemental Table 2.** Oligonucleotides for genotyping of T-DNA insertion lines.

| <b>Primer</b> | <b>Sequence 5'→3'</b>              | <b>Gene</b> | <b>AGI code</b> |
|---------------|------------------------------------|-------------|-----------------|
| At3g02790-l-f | TTCCATTTTCTCACCGACCAA              | <i>MBS1</i> | At3g02790       |
| At3g02790-l-r | TTCTTCAAGCTTCCCCTGAT               |             |                 |
| at5g16470-l-f | CGGTTTCTGTTTTATGAAATG              | <i>MBS2</i> | At5g16470       |
| at5g16470-l-r | TAAGGCTTCCTCTGATTCCA               |             |                 |
| LB-SALK-b1.3  | ATTTTGCCGATTTTCGGAAC               |             |                 |
| LB-Wisc       | AACGTCCGCAATGTGTTATTAAGTTGTC       |             |                 |
| LB-SAIL       | GCCTTTTCAGAAATGGATAAATAGCCTTGCTTCC |             |                 |
| At3g02790-ATG | ATGACTGGTAAGGCCAAGC                | <i>MBS1</i> | At3g02790       |
| At5g16470-ATG | ATGACAGGCAAAGCAAAG                 | <i>MBS2</i> | At5g16470       |

**Supplemental Table 3.** Transformation vectors for the generation of RNAi lines and their gene-specific tags (GST).

The sizes of the coding regions (CDS) of the wild-type alleles and the region of each locus covered by the RNAi construct are also given.

| <b>Gene</b> | <b>AGI code</b> | <b>Vector</b>         | <b>GST (bp)</b> | <b>CDS (bp)</b> | <b>Region covered</b> |
|-------------|-----------------|-----------------------|-----------------|-----------------|-----------------------|
| <i>MBS1</i> | At3g02790       | pENTR207_CATMA3a01730 | 180             | 318             | 252-431               |
| <i>MBS2</i> | At5g16470       | pENTR207_CATMA5a14770 | 300             | 315             | 120- 419              |



**Supplemental Table 4.** Oligonucleotides for transgenic constructs in *Arabidopsis*.

Restriction sites are underlined, lowercase letters indicate extra nucleotides introduced at the 5' end.

| <b>Primer</b>   | <b>Sequence 5'→3'</b>                     | <b>Gene</b> | <b>AGI code</b> |
|-----------------|-------------------------------------------|-------------|-----------------|
| BamH-3g02790    | cg <u>GGATCC</u> ATGACTGGTAAGGCCAAGC      | <i>MBS1</i> | At3g02790       |
| At3g02790-XbaI  | gc <u>TCTAGAC</u> CTTCTTCAAGCTTCCCCTGATAC |             |                 |
| SacI-3g02790    | c <u>GAGCTC</u> TAACTCCCATATTTTGG         | <i>MBS1</i> | At3g02790       |
| At3g02790-NcoI  | tt <u>CCATGGC</u> CTTCTTCAAGCTTCCCCTGATAC |             |                 |
| XhoI-At5g16470  | tt <u>CTCGAGAT</u> GACAGGCAAAGCAAAGCC     | <i>MBS2</i> | At5g16470       |
| At5g16470-NcoI  | tt <u>CCATGGC</u> TTCTTAAGGCTTCCTCTGATTC  |             |                 |
| XhoI-At3g02790  | tt <u>CTCGAGAT</u> GACTGGTAAGGCCAAGCCA    | <i>MBS1</i> | At3g02790       |
| At3g02790-NcoI  | tt <u>CCATGGC</u> CTTCTTCAAGCTTCCCCTGATAC |             |                 |
| NdeI-At3g02790  | ggaattc <u>CATATG</u> ACTGGTAAGGCCAAGC    | <i>MBS1</i> | At3g02790       |
| At3g02790 EcoRI | g <u>GAATTC</u> TTACTTCTTCAAGCTTCCCC      |             |                 |

**Supplemental Table 5.** Oligonucleotides for RT-PCR.

| <b>Primer</b> | <b>Sequence 5'→3'</b>             | <b>Gene</b>    | <b>AGI code</b> |
|---------------|-----------------------------------|----------------|-----------------|
| Actin2-F      | TCTTCTTCCGCTCTTTCTTTCC            | <i>Actin2</i>  | AT3G18780       |
| Actin2-R      | TCTTACAATTTCCCGCTCTGC             |                |                 |
| Ubiq RT-f     | GATCTTTGCCGGAAAACAATTGGAGGATGGT   | <i>Ubi10</i>   | At4G05320       |
| Ubiq RT-r     | CGACTTGTCATTAGAAAAGAAAGAGATAACAGG |                |                 |
| NdeI-ZF       | GGAATTCCATATGGGAAAGGCTAAGCCC      | Cr-MBS         | -               |
| ZF-EcoRI      | GGAATTCTCACTTCTTGGTAGATCCGC       |                |                 |
| At3g02790-ATG | ATGACTGGTAAGGCCAAGC               | <i>At-MBS1</i> | At3g02790       |
| At3g02790-l-r | TTCTTCAAGCTTCCCCTGAT              |                |                 |
| at5g16470-ATG | ATGACAGGCAAAGCAAAG                | <i>At-MBS2</i> | At5g16470       |
| at5g16470-l-r | TAAGGCTTCCTCTGATTCCA              |                |                 |

**Supplemental Table 6.** Oligonucleotides for quantitative real-time PCR.

| <b>Primer</b>  | <b>Sequence 5'→3'</b>     | <b>Gene</b>                              | <b>AGI code</b> |
|----------------|---------------------------|------------------------------------------|-----------------|
| PROFILIN 1-r   | AGAGCGCCAAATTTCTCAG       | <i>PROFILIN1</i>                         | At2g19760       |
| PROFILIN 1-f   | CCTCCAGGTCCCTTCTTCC       |                                          |                 |
| aaa-f          | GGCAATCTTTCTCGTTTTACCC    | <i>AAA-ATPase</i>                        | At3g28580       |
| aaa-r          | GCTCTATCGTCTTCCCTTCTCTC   |                                          |                 |
| BAP1-f         | GTGGGATCGTCAATCTTTCG      | <i>BAP1</i>                              | At3g61190       |
| BAP1-r         | GGCCACCGTATCCATCAATC      |                                          |                 |
| APX1-f         | TGCCTTTTTCGCTGATTACG      | <i>APX1</i>                              | At1g07890       |
| APX1-r         | CAAAAACAGCCATGACTCTCG     |                                          |                 |
| ZAT12-f        | TGCGAGTCACAAGAAGCCTA      | <i>ZAT12</i>                             | At5g59820       |
| ZAT12-r        | GTGTCCTCCCAAAGCTTGTC      |                                          |                 |
| CAT2qRT-f      | AACTCCGCCTGCTGTCTG        | <i>CAT2</i>                              | AT4g35090       |
| CAT2qRT-r      | ATAGGGCATCAATCCATC        |                                          |                 |
| NOD-f          | GAGGTCTTCAAAGGAACAAAGGAG  | <i>NOD2</i>                              | At5g64870       |
| NOD-r          | CTGCTTCACATTGGCGTTG       |                                          |                 |
| WRKY40-f       | TCTCACTATTGGCGTACTCG      | <i>WRKY40</i>                            | At1g80840       |
| WRKY40-r       | CGAGAGCTTCTTGTTCTCAGC     |                                          |                 |
| At3g50970f     | CAAACAGGCGATCAAAGGAT      | <i>Toll-IL-resistance domain protein</i> | At3g50970       |
| At3g50970r     | CAACACCACGAAGAAGCGTA      |                                          |                 |
| At3gqRT3'UTR f | AAAGCTCGTGAATCTCCATGCTGT  | <i>MBS1</i>                              | At3g02790       |
| At3gqRT3'UTR r | GCACATTACACTCTTTAACATCAAA |                                          |                 |
| qSIB1P1        | GACGACCACAACCTTTCTCCA     | <i>SIB1</i>                              | At3g56710       |
| qSIB1P2        | CGCATTCAACGGCTCATAAC      |                                          |                 |
| CYP5_qf        | TCTTCCTCTTCGGAGCCATA      | <i>CYP5</i>                              | At2g29960       |
| CYP5_qr        | AAGCTGGGAATGATTGATG       |                                          |                 |
